# Supplementary material
Source: MDPI journal article supplement (https://www.mdpi.com/2073-445X/6/2/26)
Supplement: s1 [file s1]

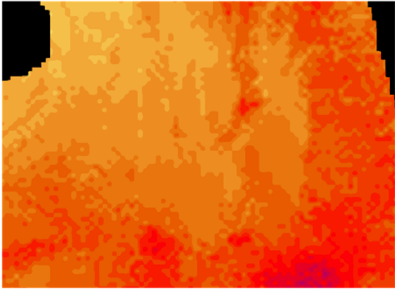

(a)

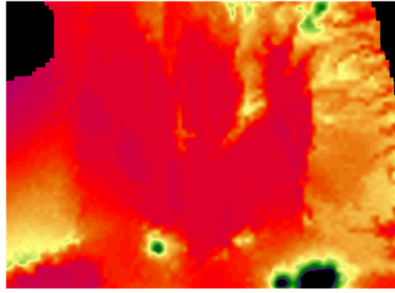

(b)

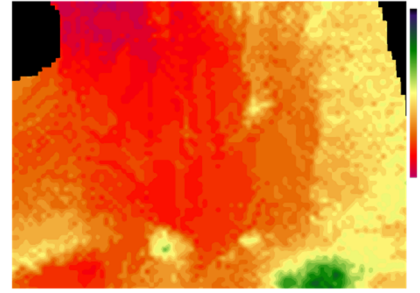

(c)

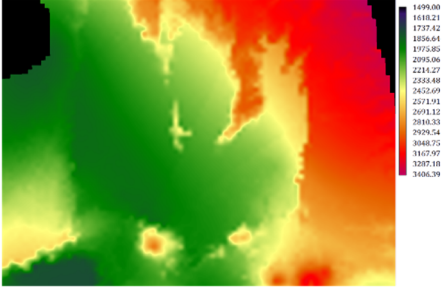

(d)

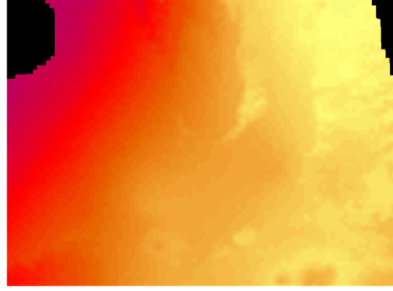

(e)

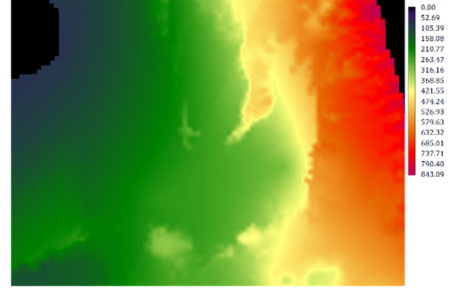

(f)

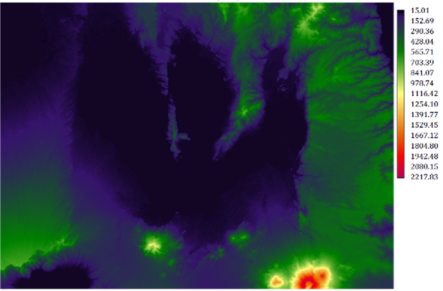

(g)

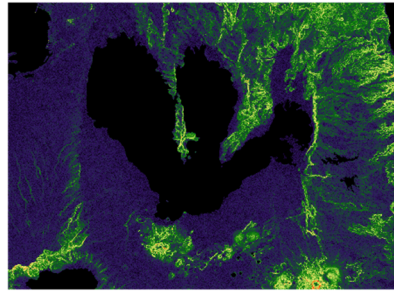

(h)

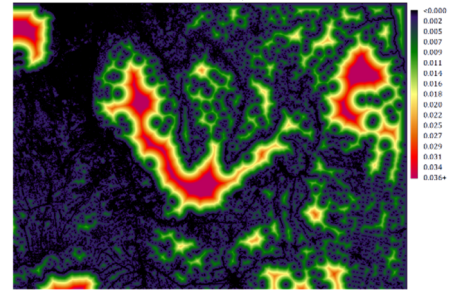

(i)

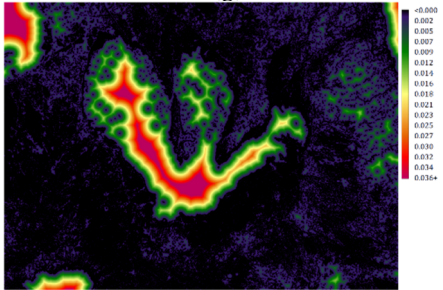

(j)

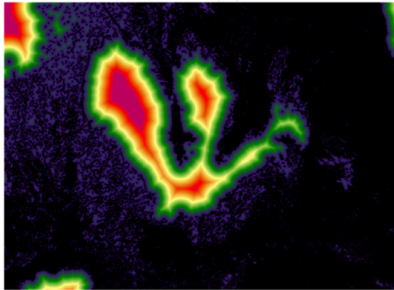

(k)

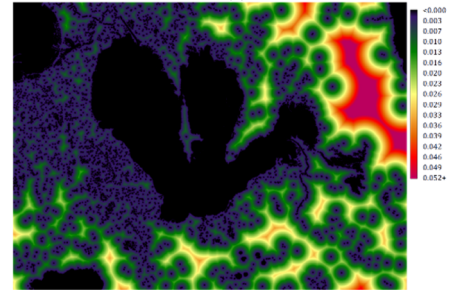

(l)

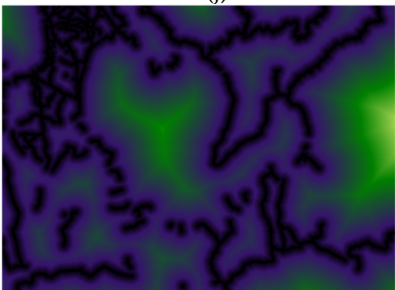

(m)

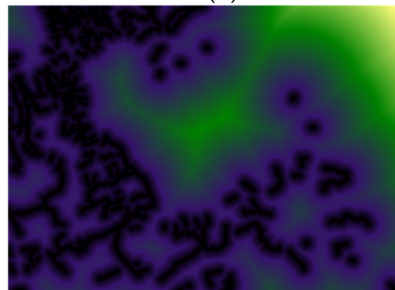

(n)

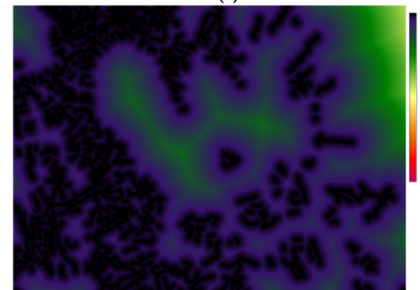

(o)

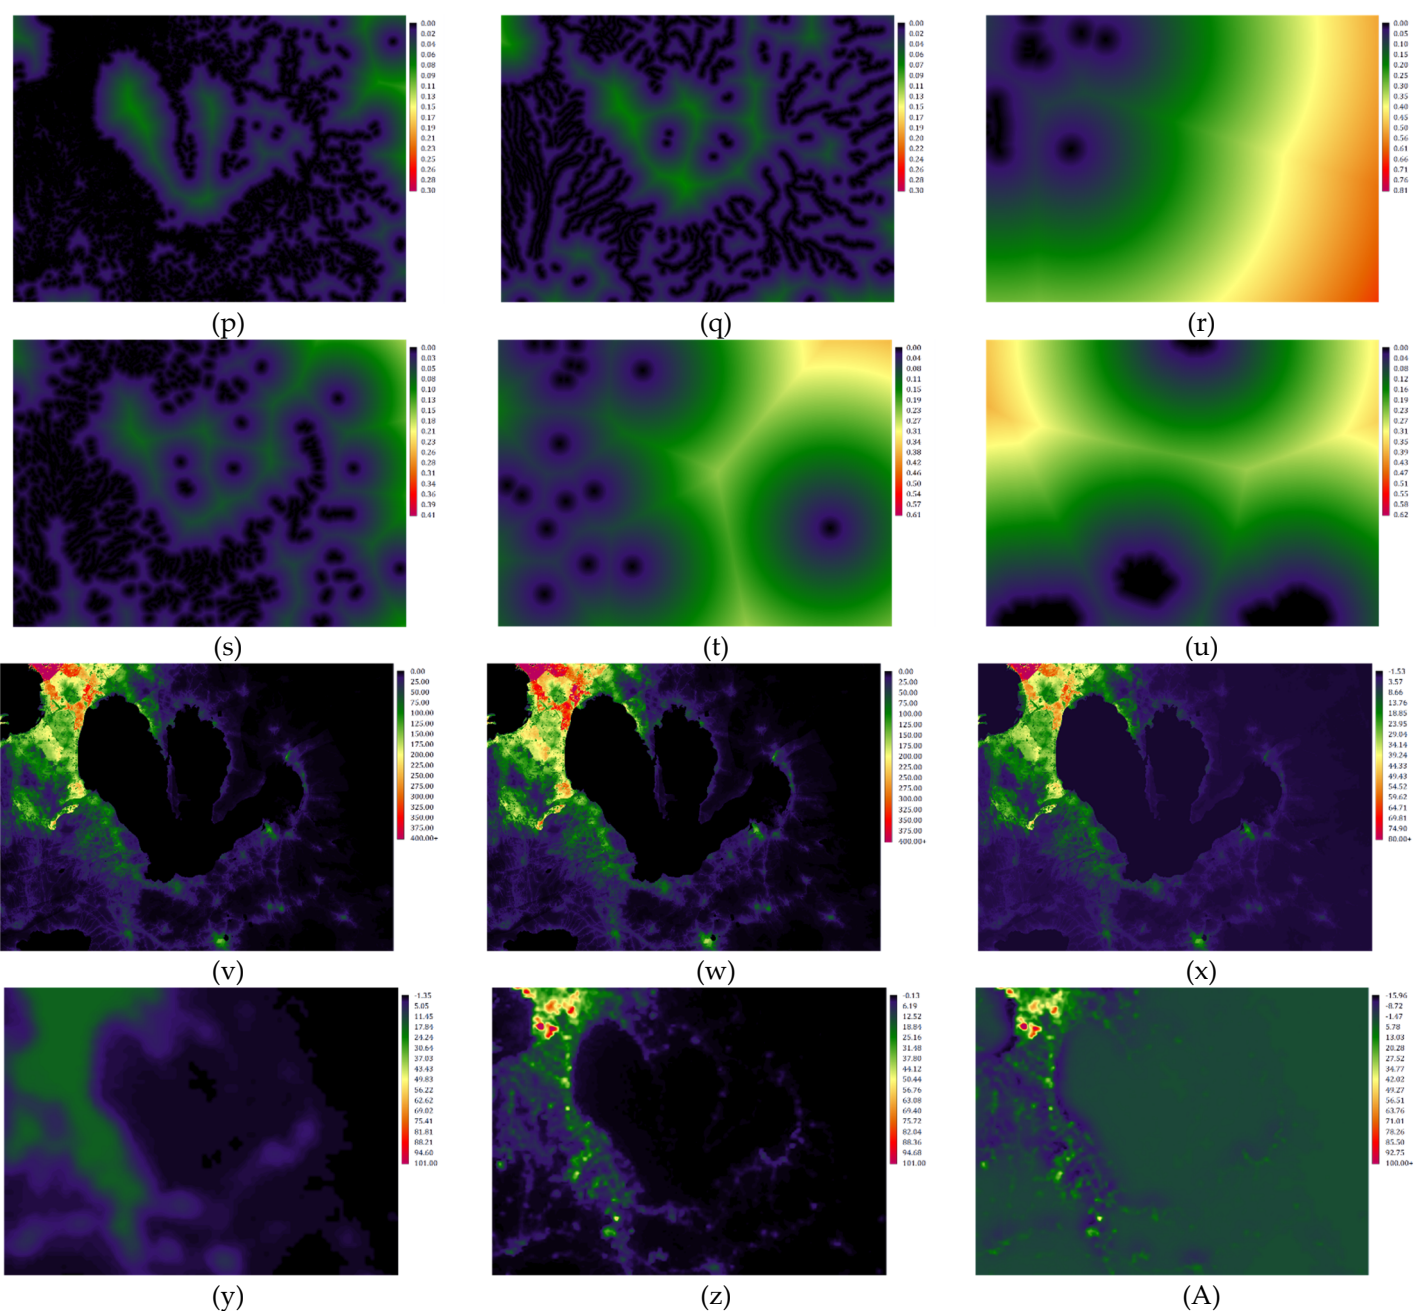

**Figure S1.** Interpretation of all driver variables included in the model. (a):BIO3 (b):BIO6 (c):BIO7 (d):BIO12 (e):BIO15 (f):BIO19 (g):DEM (h):SLOPE (i):Dist\_Built (j):Dist\_Crop (k):Dist\_Tree (l):Dist\_Water (m):Road\_Dist1 (n): Road\_Dist2 (o): Road\_Dist3 (p): Road\_Dist4 (q):Dist\_River (r):Dist\_Canal (s):Dist\_Stream (t):Dist\_Golf (u):Dist\_Protect (v):Pop\_2007 (w):Pop\_2015 (x):Pop\_Ch (y):NL\_2007 (z):NL\_2015 (A):NL\_Ch.
